# Supplementary material for: Metabolic, transcriptomic, and genetic analyses of candidate genes for seed size in watermelon
Source: Front Plant Sci. 2024 Jul 16;15:1394724. doi: 10.3389/fpls.2024.1394724 (PMC11286464; doi:10.3389/fpls.2024.1394724)
Supplement: Supplementary Table 5 — KEGG annotation of DEGs between BW85 and F211 at 13 DAP. [file Table_5.xlsx]

## Sheet: W07_W08_W09_vs_W10_W11_W12.KEGG
#KEGG_n	830	KEGG_N	4230
#Pathway	ko_ID	DEG	Gene	DEG_all	Gene_all
Plant hormone signal transduction	ko04075	73	258	830	4230	Cla97C01G004700;Cla97C01G006220;Cla97C01G007030;Cla97C01G011610;Cla97C01G014900;Cla97C01G016340;Cla97C01G016350;Cla97C01G017390;Cla97C01G017970;Cla97C02G031370;Cla97C02G033200;Cla97C02G034010;Cla97C02G042420;Cla97C02G044480;Cla97C02G048210;Cla97C03G052090;Cla97C03G059880;Cla97C03G064460;Cla97C03G066470;Cla97C03G066940;Cla97C04G073350;Cla97C04G076960;Cla97C05G081110;Cla97C05G081210;Cla97C05G085160…	K14484+K14491+K14489+K14431+K13415+K14487+K14487+K14484+K14498+K14488+K14505+K13449+K14484+K14488+K14431+K14497+K14494+K14432+K14497+K14493+K14496+K14488+K14496+K14506+K14516+K14509+K14484+K14497+K14491+K14497+K14487+K14494+K14487+K14515+K14486+K14499+K14505+K14488+K14488+K14489+K14488+K14490+K14484+K14484+K14484+K14504+K14516+K13946+K14496+K14431+K14486+K14484+K14497+K13464+K14492+K14514+K14484+…
Starch and sucrose metabolism	ko00500	65	253	830	4230	Citrullus_lanatus_newGene_852;Cla97C01G001950;Cla97C01G003970;Cla97C01G006680;Cla97C01G008790;Cla97C01G011000;Cla97C01G017270;Cla97C01G021790;Cla97C01G023850;Cla97C02G029600;Cla97C02G047080;Cla97C03G051130;Cla97C03G059290;Cla97C03G062630;Cla97C03G063780;Cla97C03G064990;Cla97C03G066380;Cla97C03G067530;Cla97C04G072460;Cla97C04G077580;Cla97C05G082830;Cla97C05G082930;Cla97C05G082940;Cla97C05G084480;C…	K00012+K01194+K01193+K01835+K00695+K13648+K00844+K01051+K16055+K00975+K01051+K01087+K00688+K19892+K01188+K00695+K01051+K01051+K00705+K05350+K08679+K01051+K01051+K01177+K00975+K00847+K00963+K01188+K00844+K00975+K05349+K16055+K00975+K08679+K05349+K16055+K05350+K01087+K00700+K00012+K01188+K01810+K01193+K01193+K01051+K13648+K15920+K08678+K01051+K16055+K01177+K01177+K20867+K01051+K01188+K08678+K00695+…
Carbon metabolism	ko01200	64	236	830	4230	Cla97C01G003980;Cla97C01G006480;Cla97C01G017270;Cla97C01G017480;Cla97C01G020370;Cla97C02G027180;Cla97C02G029440;Cla97C02G038850;Cla97C02G042310;Cla97C02G044610;Cla97C02G044620;Cla97C02G046130;Cla97C02G048000;Cla97C03G054650;Cla97C03G054690;Cla97C03G061210;Cla97C03G062670;Cla97C03G063130;Cla97C03G066540;Cla97C04G071440;Cla97C04G071650;Cla97C04G076580;Cla97C04G076620;Cla97C05G082060;Cla97C05G082510…	K00616+K01807+K00844+K00600+K00640+K00640+K00626+K15634+K01807+K00927+K00134+K01803+K15634+K00134+K01638+K19269+K05605+K00830+K01738+K01803+K15633+K01689+K01623+K01962+K15919+K00615+K01006+K00249+K00844+K00051+K01807+K00121+K01900+K13034+K00025+K00600+K00297+K01100+K00026+K00850+K18121+K18121+K00058+K11517+K11517+K03781+K01810+K14272+K00029+K00948+K00140+K00134+K00831+K00873+K00122+K01738+K01623+…
Biosynthesis of amino acids	ko01230	54	210	830	4230	Citrullus_lanatus_newGene_1824;Cla97C01G003980;Cla97C01G006480;Cla97C01G008240;Cla97C01G016820;Cla97C01G017480;Cla97C01G018010;Cla97C01G020370;Cla97C02G027180;Cla97C02G027440;Cla97C02G038850;Cla97C02G042310;Cla97C02G042740;Cla97C02G043570;Cla97C02G044610;Cla97C02G044620;Cla97C02G046130;Cla97C02G048000;Cla97C03G054650;Cla97C03G054820;Cla97C03G060020;Cla97C03G066540;Cla97C04G071030;Cla97C04G071440;…	K01626+K00616+K01807+K11755+K14682+K00600+K01626+K00640+K00640+K00891+K15634+K01807+K01620+K00815+K00927+K00134+K01803+K15634+K00134+K01940+K01915+K01738+K00286+K01803+K15633+K01689+K01623+K00615+K01915+K00891+K01807+K01476+K13034+K00600+K00850+K00058+K00826+K14272+K14085+K00053+K00948+K00134+K00831+K00873+K01850+K01738+K01623+K01733+K06001+K00134+K00873+K01738+K14454+K00815
Ribosome	ko03010	46	278	830	4230	Citrullus_lanatus_newGene_2113;Cla97C00G000070;Cla97C01G000940;Cla97C01G005080;Cla97C01G016790;Cla97C02G026600;Cla97C02G028300;Cla97C02G039000;Cla97C02G048100;Cla97C03G052920;Cla97C03G058440;Cla97C03G060470;Cla97C03G064340;Cla97C03G065730;Cla97C03G066250;Cla97C04G070410;Cla97C05G083620;Cla97C05G088670;Cla97C05G097520;Cla97C05G100170;Cla97C05G100490;Cla97C05G107920;Cla97C06G109710;Cla97C06G109810;…	K02983+K02998+K02940+K02873+K02935+K02866+K02933+K02897+K02943+K02957+K02912+K02952+K02908+K02959+K02983+K02981+K02921+K02881+K02924+K02909+K02896+K02900+K02953+K02906+K02978+K02971+K02894+K02872+K02974+K02919+K02937+K02993+K02979+K02868+K02917+K02925+K02964+K02891+K02935+K02893+K02895+K02952+K02904+K02863+K02889+K02966
Amino sugar and nucleotide sugar metabolism	ko00520	41	131	830	4230	Citrullus_lanatus_newGene_852;Cla97C01G001730;Cla97C01G003100;Cla97C01G004990;Cla97C01G006680;Cla97C01G011000;Cla97C01G017270;Cla97C01G025550;Cla97C02G029600;Cla97C02G047870;Cla97C04G078470;Cla97C05G082830;Cla97C05G086630;Cla97C05G090720;Cla97C05G093290;Cla97C05G093450;Cla97C05G093680;Cla97C05G099180;Cla97C05G099630;Cla97C05G100180;Cla97C06G115410;Cla97C06G122010;Cla97C07G135500;Cla97C07G136830;C…	K00012+K01784+K01784+K01809+K01835+K13648+K00844+K12448+K00975+K12449+K13379+K08679+K00975+K01183+K00847+K00963+K01809+K06118+K00844+K00975+K00975+K08679+K01711+K12450+K13379+K00012+K01810+K12450+K13648+K15920+K08678+K20867+K12446+K08678+K01209+K00326+K00621+K00326+K00975+K12373+K08679
Phenylpropanoid biosynthesis	ko00940	32	180	830	4230	Cla97C01G015760;Cla97C01G016570;Cla97C02G033300;Cla97C02G034290;Cla97C02G035070;Cla97C03G050850;Cla97C03G055890;Cla97C03G063780;Cla97C04G070210;Cla97C04G075800;Cla97C04G077580;Cla97C05G096160;Cla97C05G098800;Cla97C05G103810;Cla97C06G113900;Cla97C06G123590;Cla97C07G135790;Cla97C07G136190;Cla97C08G153160;Cla97C08G157670;Cla97C09G180150;Cla97C10G188660;Cla97C10G193750;Cla97C10G195860;Cla97C10G197400…	K00430+K00430+K00083+K01904+K00430+K00487+K00430+K01188+K00430+K10775+K05350+K01188+K00430+K05349+K00430+K05349+K00430+K05350+K01188+K00430+K00430+K13066+K01188+K09753+K00430+K01188+K00430+K00588+K00588+K00588+K05350+K05350
Glycolysis / Gluconeogenesis	ko00010	32	111	830	4230	Cla97C01G001460;Cla97C01G006680;Cla97C01G013600;Cla97C01G017270;Cla97C01G021230;Cla97C02G038850;Cla97C02G044610;Cla97C02G044620;Cla97C02G046130;Cla97C02G048000;Cla97C03G054650;Cla97C04G071440;Cla97C04G071650;Cla97C04G076580;Cla97C04G076620;Cla97C05G099630;Cla97C06G110610;Cla97C06G123720;Cla97C07G135470;Cla97C07G140230;Cla97C08G154900;Cla97C09G163100;Cla97C09G172570;Cla97C09G172580;Cla97C09G184320…	K00001+K01835+K00001+K00844+K00895+K15634+K00927+K00134+K01803+K15634+K00134+K01803+K15633+K01689+K01623+K00844+K00121+K01785+K01792+K00850+K01810+K14085+K18857+K18857+K00134+K00873+K01785+K01623+K00134+K01792+K00873+K01610
Purine metabolism	ko00230	28	155	830	4230	Citrullus_lanatus_newGene_1398;Cla97C01G006680;Cla97C01G014770;Cla97C01G021740;Cla97C02G038060;Cla97C03G053490;Cla97C03G054150;Cla97C03G055360;Cla97C03G061560;Cla97C03G063500;Cla97C04G073560;Cla97C04G079730;Cla97C05G080010;Cla97C05G085860;Cla97C05G086390;Cla97C05G099770;Cla97C07G138330;Cla97C07G142080;Cla97C08G149920;Cla97C08G150350;Cla97C08G156810;Cla97C09G163140;Cla97C09G175130;Cla97C10G193010;…	K03043+K01835+K10807+K01488+K02320+K03020+K01517+K02083+K14641+K00106+K01490+K02325+K00940+K13811+K03787+K13811+K00940+K03016+K00760+K00856+K00759+K20790+K00948+K00873+K00764+K00873+K01427+K03504
Cysteine and methionine metabolism	ko00270	25	86	830	4230	Cla97C01G020370;Cla97C01G021180;Cla97C02G027180;Cla97C02G043570;Cla97C02G043890;Cla97C03G064170;Cla97C03G066540;Cla97C04G073140;Cla97C05G091060;Cla97C06G113030;Cla97C06G115890;Cla97C06G116670;Cla97C06G117640;Cla97C07G136660;Cla97C08G160480;Cla97C09G169740;Cla97C09G173910;Cla97C10G185400;Cla97C10G199540;Cla97C10G205990;Cla97C11G218580;Cla97C11G218590;Cla97C11G219440;Cla97C11G220050;Cla97C11G223810	K00640+K05933+K00640+K00815+K05933+K00558+K01738+K00827+K00797+K13034+K00547+K00025+K01251+K00026+K00826+K08963+K05933+K01761+K01738+K00827+K01611+K01611+K01738+K14454+K00815
Plant-pathogen interaction	ko04626	24	117	830	4230	Cla97C01G002330;Cla97C02G026440;Cla97C02G034010;Cla97C02G044900;Cla97C02G050380;Cla97C03G050940;Cla97C03G060340;Cla97C03G063420;Cla97C03G067430;Cla97C04G071010;Cla97C04G071530;Cla97C04G079670;Cla97C05G083850;Cla97C05G096490;Cla97C05G100760;Cla97C05G108650;Cla97C07G142250;Cla97C10G187660;Cla97C10G188970;Cla97C10G194650;Cla97C10G195960;Cla97C10G198500;Cla97C10G205450;Cla97C11G211390	K13447+K13412+K13449+K13434+K02183+K13424+K13414+K13412+K13447+K13448+K02183+K05391+K13456+K13412+K13448+K05391+K13412+K13448+K13448+K13436+K13447+K13448+K13412+K05391
Peroxisome	ko04146	24	82	830	4230	Cla97C01G021440;Cla97C01G023720;Cla97C02G029500;Cla97C02G036270;Cla97C02G048160;Cla97C03G050910;Cla97C03G063130;Cla97C03G063500;Cla97C03G066780;Cla97C04G071940;Cla97C06G112610;Cla97C06G120130;Cla97C07G136380;Cla97C07G138380;Cla97C07G141290;Cla97C07G141310;Cla97C08G152180;Cla97C10G187250;Cla97C10G188120;Cla97C10G190570;Cla97C10G193470;Cla97C10G194430;Cla97C11G208850;Cla97C11G224830	K13347+K13341+K01897+K00232+K13356+K04564+K00830+K00106+K04565+K04565+K01897+K03426+K00232+K13344+K11517+K11517+K03781+K13337+K13342+K13348+K13348+K01897+K13348+K03781
Oxidative phosphorylation	ko00190	23	143	830	4230	Citrullus_lanatus_newGene_3175;Cla97C03G057620;Cla97C03G061940;Cla97C04G072720;Cla97C04G076890;Cla97C04G078000;Cla97C04G078680;Cla97C05G090620;Cla97C05G092230;Cla97C05G098290;Cla97C06G111680;Cla97C06G122930;Cla97C07G136370;Cla97C07G136840;Cla97C07G139680;Cla97C08G146490;Cla97C09G163600;Cla97C09G166470;Cla97C09G179830;Cla97C10G191520;Cla97C11G208240;Cla97C11G210610;Cla97C11G217950	K02140+K03952+K03955+K03945+K00419+K03966+K02136+K03949+K00416+K03661+K01507+K01535+K02258+K02259+K02265+K02113+K02135+K02137+K01535+K02266+K02140+K03965+K01535
Proteasome	ko03050	22	47	830	4230	Citrullus_lanatus_newGene_2845;Cla97C01G009730;Cla97C01G009740;Cla97C01G019860;Cla97C02G028810;Cla97C03G054590;Cla97C04G071490;Cla97C05G082730;Cla97C05G086170;Cla97C07G129900;Cla97C08G148650;Cla97C08G152990;Cla97C08G158280;Cla97C08G158440;Cla97C08G159260;Cla97C09G163120;Cla97C10G185190;Cla97C11G206640;Cla97C11G212240;Cla97C11G218370;Cla97C11G219770;Cla97C11G222940	K03036+K02729+K02726+K02731+K03028+K03037+K02727+K02732+K02734+K03062+K02735+K02737+K03064+K02725+K03030+K02730+K02731+K02739+K11599+K03062+K02737+K02728
Pyrimidine metabolism	ko00240	22	125	830	4230	Citrullus_lanatus_newGene_1398;Cla97C01G010410;Cla97C01G014770;Cla97C02G038060;Cla97C03G053490;Cla97C03G054910;Cla97C03G061560;Cla97C04G079730;Cla97C05G080010;Cla97C05G083380;Cla97C05G086390;Cla97C05G089220;Cla97C06G110040;Cla97C06G125470;Cla97C07G138330;Cla97C07G142080;Cla97C07G142490;Cla97C08G158740;Cla97C09G163140;Cla97C09G170950;Cla97C09G183120;Cla97C11G223480	K03043+K00857+K10807+K02320+K03020+K01493+K14641+K02325+K00940+K13800+K03787+K13800+K13800+K16904+K00940+K03016+K16904+K01520+K20790+K16904+K01955+K03504
Carbon fixation in photosynthetic organisms	ko00710	22	70	830	4230	Cla97C01G006480;Cla97C02G042310;Cla97C02G044610;Cla97C02G044620;Cla97C02G046130;Cla97C03G054650;Cla97C04G071440;Cla97C04G076620;Cla97C05G082860;Cla97C05G086990;Cla97C05G103110;Cla97C05G103980;Cla97C06G116670;Cla97C07G132400;Cla97C07G136660;Cla97C08G161460;Cla97C09G162050;Cla97C09G184320;Cla97C10G202380;Cla97C11G213800;Cla97C11G220050;Cla97C11G220850	K01807+K01807+K00927+K00134+K01803+K00134+K01803+K01623+K00615+K01006+K00051+K01807+K00025+K01100+K00026+K14272+K00029+K00134+K01623+K00134+K14454+K01610
Glyoxylate and dicarboxylate metabolism	ko00630	21	70	830	4230	Cla97C01G009760;Cla97C01G017480;Cla97C02G029440;Cla97C03G054690;Cla97C03G060020;Cla97C03G061210;Cla97C03G063130;Cla97C05G082510;Cla97C05G086890;Cla97C06G116670;Cla97C06G117660;Cla97C07G136660;Cla97C07G140620;Cla97C07G140630;Cla97C07G141290;Cla97C07G141310;Cla97C08G152180;Cla97C08G161460;Cla97C10G197020;Cla97C10G199080;Cla97C11G224830	K02437+K00600+K00626+K01638+K01915+K19269+K00830+K15919+K01915+K00025+K00600+K00026+K18121+K18121+K11517+K11517+K03781+K14272+K00122+K00284+K03781
Glycine, serine and threonine metabolism	ko00260	20	73	830	4230	Cla97C01G003770;Cla97C01G003780;Cla97C01G009760;Cla97C01G017480;Cla97C02G038850;Cla97C02G042740;Cla97C02G048000;Cla97C03G063130;Cla97C04G071650;Cla97C04G073140;Cla97C05G082510;Cla97C06G115650;Cla97C06G117660;Cla97C07G141010;Cla97C08G161460;Cla97C09G163100;Cla97C10G184870;Cla97C10G205990;Cla97C11G207970;Cla97C11G212110	K00276+K00276+K02437+K00600+K15634+K01620+K15634+K00830+K15633+K00827+K15919+K00276+K00600+K00058+K14272+K14085+K00831+K00827+K01733+K06001
Pentose and glucuronate interconversions	ko00040	19	109	830	4230	Citrullus_lanatus_newGene_852;Cla97C01G021790;Cla97C02G047080;Cla97C03G054380;Cla97C03G066380;Cla97C03G067530;Cla97C05G082930;Cla97C05G082940;Cla97C05G084240;Cla97C05G089700;Cla97C05G093450;Cla97C06G117330;Cla97C07G129970;Cla97C08G150600;Cla97C08G153150;Cla97C09G168020;Cla97C10G184580;Cla97C10G190170;Cla97C11G218300	K00012+K01051+K01051+K01728+K01051+K01051+K01051+K01051+K01728+K00008+K00963+K01728+K01728+K01728+K00012+K01051+K01051+K01051+K01805
Galactose metabolism	ko00052	18	49	830	4230	Cla97C01G001730;Cla97C01G003100;Cla97C01G003970;Cla97C01G006680;Cla97C01G010580;Cla97C01G012440;Cla97C01G017270;Cla97C05G093450;Cla97C05G099630;Cla97C06G120620;Cla97C06G123720;Cla97C07G140230;Cla97C09G162700;Cla97C09G162720;Cla97C10G194470;Cla97C10G196740;Cla97C10G197800;Cla97C11G218690	K01784+K01784+K01193+K01835+K18819+K06617+K00844+K00963+K00844+K06617+K01785+K00850+K01193+K01193+K18819+K06617+K01785+K07407
Spliceosome	ko03040	18	151	830	4230	Cla97C01G004800;Cla97C02G041850;Cla97C04G076950;Cla97C05G080090;Cla97C05G085070;Cla97C05G107440;Cla97C05G108660;Cla97C06G114530;Cla97C07G130050;Cla97C08G149660;Cla97C09G178380;Cla97C09G178970;Cla97C10G191850;Cla97C10G194360;Cla97C10G195280;Cla97C10G198870;Cla97C10G200740;Cla97C11G224500	K12870+K12819+K11099+K12877+K12819+K12822+K12896+K12862+K12624+K12622+K12870+K12869+K12818+K12835+K12626+K12865+K12900+K11087
RNA degradation	ko03018	17	89	830	4230	Cla97C04G069800;Cla97C04G072050;Cla97C04G072070;Cla97C04G076580;Cla97C05G097190;Cla97C05G102660;Cla97C07G130050;Cla97C07G140230;Cla97C08G149660;Cla97C08G149890;Cla97C08G157060;Cla97C09G162650;Cla97C09G166130;Cla97C09G183380;Cla97C10G195280;Cla97C10G202690;Cla97C11G217520	K12589+K12591+K03654+K01689+K12592+K12613+K12624+K00850+K12622+K13126+K12581+K04077+K13126+K12619+K12626+K13126+K12598
Glycerophospholipid metabolism	ko00564	17	82	830	4230	Cla97C01G006280;Cla97C01G007800;Cla97C02G030160;Cla97C02G032310;Cla97C03G054150;Cla97C04G077470;Cla97C04G078630;Cla97C05G097260;Cla97C05G105240;Cla97C06G123370;Cla97C06G123800;Cla97C07G131780;Cla97C07G139470;Cla97C09G183960;Cla97C10G190350;Cla97C10G205180;Cla97C11G222770	K08730+K00993+K13506+K13513+K01517+K05929+K01126+K16860+K00993+K01047+K05929+K13508+K01115+K13508+K00901+K13508+K00968
Fatty acid metabolism	ko01212	17	64	830	4230	Cla97C02G029440;Cla97C02G029500;Cla97C02G036270;Cla97C02G046400;Cla97C03G055030;Cla97C03G060190;Cla97C03G063990;Cla97C05G082060;Cla97C05G087820;Cla97C05G108360;Cla97C06G112610;Cla97C06G114580;Cla97C07G136380;Cla97C08G160880;Cla97C10G194430;Cla97C10G200350;Cla97C11G208800	K00626+K01897+K00232+K10703+K10781+K11262+K00208+K01962+K00249+K10251+K01897+K10527+K00232+K03921+K01897+K10256+K10527
Protein processing in endoplasmic reticulum	ko04141	16	167	830	4230	Cla97C01G020490;Cla97C01G022840;Cla97C02G033390;Cla97C02G037070;Cla97C03G054950;Cla97C05G080230;Cla97C06G126870;Cla97C07G130310;Cla97C07G131290;Cla97C08G147730;Cla97C09G179210;Cla97C10G185910;Cla97C10G191220;Cla97C10G200500;Cla97C10G204880;Cla97C11G224210	K08852+K10666+K13993+K13249+K07342+K09481+K13525+K14009+K10666+K16196+K12670+K12668+K13993+K10666+K13993+K10666
Alanine, aspartate and glutamate metabolism	ko00250	16	54	830	4230	Citrullus_lanatus_newGene_3602;Cla97C01G007270;Cla97C02G045450;Cla97C03G054820;Cla97C03G060020;Cla97C03G063130;Cla97C04G073140;Cla97C04G079700;Cla97C05G086890;Cla97C05G096640;Cla97C08G161460;Cla97C09G180410;Cla97C09G183120;Cla97C10G205990;Cla97C11G210550;Cla97C11G220050	K01580+K01580+K01953+K01940+K01915+K00830+K00827+K01580+K01915+K13566+K14272+K00278+K01955+K00827+K00764+K14454
Endocytosis	ko04144	16	146	830	4230	Cla97C01G016210;Cla97C01G017990;Cla97C01G021020;Cla97C02G033250;Cla97C02G041050;Cla97C03G058730;Cla97C05G081260;Cla97C07G136910;Cla97C07G139470;Cla97C07G143590;Cla97C08G149840;Cla97C09G162400;Cla97C09G164140;Cla97C09G164240;Cla97C10G196910;Cla97C10G202750	K07937+K07904+K10591+K07937+K10364+K07904+K00889+K07904+K01115+K12471+K10365+K12197+K07897+K19476+K07937+K12185
Fructose and mannose metabolism	ko00051	16	51	830	4230	Cla97C01G004990;Cla97C01G017270;Cla97C01G021230;Cla97C02G046130;Cla97C04G071440;Cla97C04G076620;Cla97C05G089700;Cla97C05G093290;Cla97C05G093680;Cla97C05G099630;Cla97C05G100190;Cla97C07G135500;Cla97C07G140230;Cla97C08G145130;Cla97C10G202380;Cla97C11G218300	K01809+K00844+K00895+K01803+K01803+K01623+K00008+K00847+K01809+K00844+K19355+K01711+K00850+K19355+K01623+K01805
RNA transport	ko03013	15	143	830	4230	Cla97C02G028230;Cla97C02G043880;Cla97C03G061430;Cla97C05G080090;Cla97C06G120000;Cla97C06G120010;Cla97C08G149890;Cla97C08G156440;Cla97C09G166130;Cla97C09G173090;Cla97C09G173230;Cla97C09G173550;Cla97C10G187930;Cla97C10G189630;Cla97C10G202690	K03113+K12160+K18213+K12877+K07936+K07936+K13126+K07936+K13126+K03537+K03253+K03113+K14324+K03113+K13126
Valine, leucine and isoleucine degradation	ko00280	15	43	830	4230	Cla97C01G014300;Cla97C02G029440;Cla97C02G047030;Cla97C03G057420;Cla97C03G062670;Cla97C04G073140;Cla97C05G087770;Cla97C05G087820;Cla97C08G146990;Cla97C08G160480;Cla97C09G163100;Cla97C09G169920;Cla97C09G178020;Cla97C10G205990;Cla97C11G222430	K00166+K00626+K00253+K00020+K05605+K00827+K09699+K00249+K00166+K00826+K14085+K01968+K00140+K00827+K05605
Fatty acid degradation	ko00071	15	39	830	4230	Cla97C01G001460;Cla97C01G013600;Cla97C02G029440;Cla97C02G029500;Cla97C02G036270;Cla97C05G087820;Cla97C06G110610;Cla97C06G112610;Cla97C06G114580;Cla97C07G136380;Cla97C09G163100;Cla97C09G172570;Cla97C09G172580;Cla97C10G194430;Cla97C11G208800	K00001+K00001+K00626+K01897+K00232+K00249+K00121+K01897+K10527+K00232+K14085+K18857+K18857+K01897+K10527
DNA replication	ko03030	15	45	830	4230	Cla97C01G009530;Cla97C01G024450;Cla97C01G026140;Cla97C02G031670;Cla97C02G038060;Cla97C02G045800;Cla97C04G079730;Cla97C05G083310;Cla97C05G098670;Cla97C05G103510;Cla97C06G125140;Cla97C07G132350;Cla97C08G148610;Cla97C09G167570;Cla97C11G223480	K10745+K02541+K02542+K02212+K02320+K04802+K02325+K10742+K10739+K10740+K07466+K04802+K10756+K02210+K03504
Tyrosine metabolism	ko00350	15	51	830	4230	Cla97C01G001460;Cla97C01G003770;Cla97C01G003780;Cla97C01G013600;Cla97C01G021060;Cla97C02G043570;Cla97C06G110610;Cla97C06G115650;Cla97C07G129720;Cla97C07G136610;Cla97C09G172570;Cla97C09G172580;Cla97C11G220050;Cla97C11G222470;Cla97C11G223810	K00001+K00276+K00276+K00001+K01555+K00815+K00121+K00276+K01592+K00451+K18857+K18857+K14454+K00457+K00815
Cyanoamino acid metabolism	ko00460	14	76	830	4230	Cla97C01G017480;Cla97C03G063780;Cla97C04G077580;Cla97C05G096160;Cla97C05G103810;Cla97C06G113030;Cla97C06G117660;Cla97C06G123590;Cla97C07G136190;Cla97C08G153160;Cla97C10G193750;Cla97C10G199940;Cla97C11G224350;Cla97C11G224410	K00600+K01188+K05350+K01188+K05349+K13034+K00600+K05349+K05350+K01188+K01188+K01188+K05350+K05350
Pyruvate metabolism	ko00620	14	80	830	4230	Cla97C02G029440;Cla97C03G054690;Cla97C03G060190;Cla97C05G082060;Cla97C05G086990;Cla97C05G103110;Cla97C06G116670;Cla97C07G136660;Cla97C09G162050;Cla97C09G163100;Cla97C10G193010;Cla97C10G200870;Cla97C11G218660;Cla97C11G220850	K00626+K01638+K11262+K01962+K01006+K00051+K00025+K00026+K00029+K14085+K00873+K00102+K00873+K01610
Phenylalanine metabolism	ko00360	14	62	830	4230	Cla97C01G003770;Cla97C01G003780;Cla97C02G034290;Cla97C02G043570;Cla97C03G050850;Cla97C04G075800;Cla97C05G091610;Cla97C06G115650;Cla97C11G219640;Cla97C11G219660;Cla97C11G219690;Cla97C11G220050;Cla97C11G222470;Cla97C11G223810	K00276+K00276+K01904+K00815+K00487+K10775+K00074+K00276+K00588+K00588+K00588+K14454+K00457+K00815
beta-Alanine metabolism	ko00410	14	40	830	4230	Citrullus_lanatus_newGene_3602;Cla97C01G003770;Cla97C01G003780;Cla97C01G007270;Cla97C03G062670;Cla97C04G079700;Cla97C05G087820;Cla97C05G091060;Cla97C06G115650;Cla97C07G130140;Cla97C09G163100;Cla97C09G166190;Cla97C09G178020;Cla97C11G222430	K01580+K00276+K00276+K01580+K05605+K01580+K00249+K00797+K00276+K01918+K14085+K13366+K00140+K05605
Ribosome biogenesis in eukaryotes	ko03008	14	80	830	4230	Cla97C01G010640;Cla97C03G064050;Cla97C03G064060;Cla97C06G120000;Cla97C06G120010;Cla97C06G121190;Cla97C06G122910;Cla97C07G143970;Cla97C08G146640;Cla97C08G156440;Cla97C09G168320;Cla97C09G169850;Cla97C09G173090;Cla97C09G183380	K14539+K14521+K14521+K07936+K07936+K03264+K14552+K14550+K14570+K07936+K14567+K14538+K03537+K12619
Ascorbate and aldarate metabolism	ko00053	13	45	830	4230	Citrullus_lanatus_newGene_852;Cla97C01G010340;Cla97C01G019890;Cla97C02G034220;Cla97C02G046770;Cla97C07G140270;Cla97C08G148570;Cla97C08G153150;Cla97C08G156740;Cla97C09G163100;Cla97C09G173710;Cla97C10G202230;Cla97C11G220240	K00012+K10047+K00434+K17744+K00434+K00469+K00434+K00012+K00434+K14085+K14190+K08232+K00434
Pentose phosphate pathway	ko00030	12	48	830	4230	Cla97C01G003980;Cla97C01G006480;Cla97C01G006680;Cla97C01G021230;Cla97C02G042310;Cla97C04G076620;Cla97C05G082860;Cla97C05G103980;Cla97C07G140230;Cla97C08G154900;Cla97C09G175130;Cla97C10G202380	K00616+K01807+K01835+K00895+K01807+K01623+K00615+K01807+K00850+K01810+K00948+K01623
Phagosome	ko04145	12	67	830	4230	Cla97C01G017210;Cla97C02G036250;Cla97C02G037530;Cla97C02G050600;Cla97C03G054950;Cla97C04G073920;Cla97C05G080230;Cla97C05G098290;Cla97C09G164140;Cla97C10G193030;Cla97C10G204950;Cla97C11G208770	K07374+K04392+K04392+K07374+K07342+K07375+K09481+K03661+K07897+K07374+K07375+K04392
Ubiquinone and other terpenoid-quinone biosynthesis	ko00130	12	46	830	4230	Cla97C01G018740;Cla97C01G022220;Cla97C02G034290;Cla97C02G043570;Cla97C02G045650;Cla97C03G050850;Cla97C05G105340;Cla97C05G107570;Cla97C09G177610;Cla97C11G217970;Cla97C11G222470;Cla97C11G223810	K03809+K03809+K01904+K00815+K03809+K00487+K14759+K01661+K02548+K09833+K00457+K00815
Ubiquitin mediated proteolysis	ko04120	12	99	830	4230	Cla97C01G002340;Cla97C01G013000;Cla97C01G021020;Cla97C03G059960;Cla97C05G098460;Cla97C06G110530;Cla97C06G113960;Cla97C08G149090;Cla97C08G160180;Cla97C09G175760;Cla97C10G202640;Cla97C10G203790	K04706+K10576+K10591+K04506+K10144+K04506+K10581+K03875+K10570+K10143+K10588+K10590
Glycerolipid metabolism	ko00561	12	54	830	4230	Cla97C01G014020;Cla97C02G030160;Cla97C02G032310;Cla97C04G077250;Cla97C05G099180;Cla97C07G131780;Cla97C08G157250;Cla97C09G163100;Cla97C09G183960;Cla97C10G190350;Cla97C10G205180;Cla97C11G218690	K09480+K13506+K13513+K01054+K06118+K13508+K03715+K14085+K13508+K00901+K13508+K07407
Propanoate metabolism	ko00640	11	29	830	4230	Cla97C01G014300;Cla97C02G029440;Cla97C03G060190;Cla97C03G062670;Cla97C05G082060;Cla97C05G087770;Cla97C05G087820;Cla97C06G110800;Cla97C08G146990;Cla97C09G178020;Cla97C11G222430	K00166+K00626+K11262+K05605+K01962+K09699+K00249+K01900+K00166+K00140+K05605
alpha-Linolenic acid metabolism	ko00592	11	48	830	4230	Cla97C02G036270;Cla97C03G065380;Cla97C05G100160;Cla97C06G114580;Cla97C06G123370;Cla97C07G136380;Cla97C09G172570;Cla97C09G172580;Cla97C11G208800;Cla97C11G214950;Cla97C11G219830	K00232+K05894+K08241+K10527+K01047+K00232+K18857+K18857+K10527+K05894+K00454
Inositol phosphate metabolism	ko00562	11	57	830	4230	Cla97C01G010340;Cla97C01G016180;Cla97C01G018420;Cla97C02G046130;Cla97C04G071440;Cla97C05G081260;Cla97C07G136280;Cla97C07G140270;Cla97C08G155150;Cla97C09G178020;Cla97C10G198260	K10047+K01110+K01858+K01803+K01803+K00889+K01858+K00469+K00913+K00140+K01110
Carotenoid biosynthesis	ko00906	11	31	830	4230	Cla97C02G050560;Cla97C03G058030;Cla97C05G101520;Cla97C06G117340;Cla97C07G128850;Cla97C07G137260;Cla97C07G137500;Cla97C07G137780;Cla97C07G137840;Cla97C07G142100;Cla97C10G193770	K09842+K09840+K09843+K09840+K17911+K09840+K02291+K09840+K09843+K02293+K14593
Glutathione metabolism	ko00480	10	72	830	4230	Cla97C01G014770;Cla97C01G019890;Cla97C02G040260;Cla97C02G046770;Cla97C05G083630;Cla97C05G091060;Cla97C08G148570;Cla97C08G156740;Cla97C08G157490;Cla97C11G220240	K10807+K00434+K01255+K00434+K01469+K00797+K00434+K00434+K00799+K00434
Mismatch repair	ko03430	10	36	830	4230	Cla97C02G045800;Cla97C03G058510;Cla97C04G077590;Cla97C05G098670;Cla97C05G103510;Cla97C06G124500;Cla97C06G125140;Cla97C07G132350;Cla97C08G148610;Cla97C11G223480	K04802+K10746+K10746+K10739+K10740+K08735+K07466+K04802+K10756+K03504
mRNA surveillance pathway	ko03015	10	94	830	4230	Cla97C03G053860;Cla97C05G080090;Cla97C05G085150;Cla97C05G096170;Cla97C08G149890;Cla97C09G162130;Cla97C09G166130;Cla97C10G187930;Cla97C10G202690;Cla97C11G209130	K14400+K12877+K06269+K00565+K13126+K14376+K13126+K14324+K13126+K11584
Porphyrin and chlorophyll metabolism	ko00860	9	46	830	4230	Cla97C02G038270;Cla97C02G049100;Cla97C04G068530;Cla97C05G087230;Cla97C05G101330;Cla97C07G136840;Cla97C08G148460;Cla97C10G194870;Cla97C11G213900	K13545+K03404+K03403+K19073+K00510+K02259+K13600+K01749+K00231
Regulation of autophagy	ko04140	9	32	830	4230	Cla97C03G066370;Cla97C05G088570;Cla97C06G111550;Cla97C06G111650;Cla97C06G112490;Cla97C06G113630;Cla97C08G154960;Cla97C10G195810;Cla97C11G206860	K08333+K07198+K08334+K08269+K08341+K07198+K07198+K07198+K07198
Nucleotide excision repair	ko03420	9	57	830	4230	Cla97C02G045800;Cla97C04G079730;Cla97C05G098670;Cla97C05G103510;Cla97C06G125140;Cla97C07G132350;Cla97C08G148610;Cla97C08G160180;Cla97C11G223480	K04802+K02325+K10739+K10740+K07466+K04802+K10756+K10570+K03504
Terpenoid backbone biosynthesis	ko00900	9	49	830	4230	Cla97C01G011050;Cla97C02G029440;Cla97C02G036600;Cla97C03G053170;Cla97C06G118020;Cla97C06G126640;Cla97C09G182930;Cla97C10G185860;Cla97C10G191480	K00787+K00626+K00021+K03526+K15889+K00099+K00787+K00938+K01662
Phenylalanine, tyrosine and tryptophan biosynthesis	ko00400	9	48	830	4230	Citrullus_lanatus_newGene_1824;Cla97C01G018010;Cla97C02G027440;Cla97C02G043570;Cla97C05G095350;Cla97C10G198330;Cla97C11G212110;Cla97C11G220050;Cla97C11G223810	K01626+K01626+K00891+K00815+K00891+K01850+K06001+K14454+K00815
Sulfur metabolism	ko00920	9	34	830	4230	Cla97C01G020370;Cla97C01G021510;Cla97C02G027180;Cla97C03G066540;Cla97C05G085860;Cla97C05G099770;Cla97C06G113030;Cla97C10G199540;Cla97C11G219440	K00640+K05907+K00640+K01738+K13811+K13811+K13034+K01738+K01738
Steroid biosynthesis	ko00100	9	26	830	4230	Cla97C02G033380;Cla97C03G052100;Cla97C03G054830;Cla97C05G094950;Cla97C07G138820;Cla97C07G143370;Cla97C09G166970;Cla97C10G195070;Cla97C11G210690	K01052+K14424+K08246+K01052+K01824+K09828+K09828+K00559+K00801
Protein export	ko03060	8	47	830	4230	Citrullus_lanatus_newGene_3190;Cla97C01G024390;Cla97C03G054950;Cla97C04G076930;Cla97C05G080230;Cla97C05G101120;Cla97C07G134910;Cla97C08G148710	K03116+K09647+K07342+K03106+K09481+K03100+K03070+K03100
Arginine biosynthesis	ko00220	8	36	830	4230	Cla97C01G016820;Cla97C03G054820;Cla97C03G060020;Cla97C05G086890;Cla97C06G109750;Cla97C08G161460;Cla97C11G219820;Cla97C11G220050	K14682+K01940+K01915+K01915+K01476+K14272+K01427+K14454
Fatty acid biosynthesis	ko00061	8	37	830	4230	Cla97C02G029500;Cla97C03G055030;Cla97C03G060190;Cla97C03G063990;Cla97C05G082060;Cla97C06G112610;Cla97C08G160880;Cla97C10G194430	K01897+K10781+K11262+K00208+K01962+K01897+K03921+K01897
Base excision repair	ko03410	8	39	830	4230	Cla97C01G019000;Cla97C02G044760;Cla97C02G045800;Cla97C04G073670;Cla97C04G079730;Cla97C07G132350;Cla97C11G207590;Cla97C11G223480	K01247+K01246+K04802+K10802+K02325+K04802+K03648+K03504
Diterpenoid biosynthesis	ko00904	8	31	830	4230	Cla97C03G058120;Cla97C05G083220;Cla97C06G109980;Cla97C07G137160;Cla97C09G164580;Cla97C09G164590;Cla97C09G175070;Cla97C10G186460	K04125+K04123+K04123+K04125+K04124+K04124+K04123+K04123
Arginine and proline metabolism	ko00330	8	51	830	4230	Cla97C04G071030;Cla97C05G091060;Cla97C06G109750;Cla97C09G163100;Cla97C09G166190;Cla97C11G218580;Cla97C11G218590;Cla97C11G220050	K00286+K00797+K01476+K14085+K13366+K01611+K01611+K14454
Phosphatidylinositol signaling system	ko04070	8	51	830	4230	Cla97C01G010340;Cla97C01G016180;Cla97C02G050380;Cla97C04G071530;Cla97C05G081260;Cla97C08G155150;Cla97C10G190350;Cla97C10G198260	K10047+K01110+K02183+K02183+K00889+K00913+K00901+K01110
Homologous recombination	ko03440	8	41	830	4230	Cla97C03G064960;Cla97C05G082870;Cla97C05G098670;Cla97C05G103510;Cla97C06G125140;Cla97C09G175400;Cla97C10G205740;Cla97C11G223480	K04482+K10870+K10739+K10740+K07466+K10875+K08775+K03504
Tryptophan metabolism	ko00380	7	36	830	4230	Cla97C02G029440;Cla97C05G092930;Cla97C08G152180;Cla97C08G155560;Cla97C08G161510;Cla97C09G163100;Cla97C11G224830	K00626+K11816+K03781+K11816+K16903+K14085+K03781
Butanoate metabolism	ko00650	7	21	830	4230	Citrullus_lanatus_newGene_3602;Cla97C01G007270;Cla97C02G029440;Cla97C04G079700;Cla97C05G091610;Cla97C07G140620;Cla97C07G140630	K01580+K01580+K00626+K01580+K00074+K18121+K18121
Tropane, piperidine and pyridine alkaloid biosynthesis	ko00960	7	24	830	4230	Cla97C01G003770;Cla97C01G003780;Cla97C02G043570;Cla97C03G052130;Cla97C06G115650;Cla97C11G220050;Cla97C11G223810	K00276+K00276+K00815+K08081+K00276+K14454+K00815
Vitamin B6 metabolism	ko00750	7	15	830	4230	Cla97C01G000180;Cla97C02G045540;Cla97C05G093200;Cla97C09G162500;Cla97C10G184870;Cla97C10G205390;Cla97C11G207970	K05275+K06215+K00868+K13248+K00831+K06215+K01733
Isoquinoline alkaloid biosynthesis	ko00950	7	30	830	4230	Cla97C01G003770;Cla97C01G003780;Cla97C02G043570;Cla97C06G115650;Cla97C07G129720;Cla97C11G220050;Cla97C11G223810	K00276+K00276+K00815+K00276+K01592+K14454+K00815
Photosynthesis	ko00195	7	71	830	4230	Cla97C02G042490;Cla97C05G091890;Cla97C07G137540;Cla97C08G146490;Cla97C09G174970;Cla97C09G181560;Cla97C11G216950	K02721+K02639+K02717+K02113+K02639+K02717+K02699
Photosynthesis - antenna proteins	ko00196	7	19	830	4230	Cla97C01G024340;Cla97C03G058190;Cla97C03G062230;Cla97C08G149600;Cla97C08G159510;Cla97C09G182070;Cla97C10G205320	K08912+K08912+K08909+K08917+K08911+K08907+K08915
Taurine and hypotaurine metabolism	ko00430	6	13	830	4230	Citrullus_lanatus_newGene_3602;Cla97C01G007270;Cla97C04G072080;Cla97C04G079700;Cla97C06G124740;Cla97C10G197780	K01580+K01580+K10712+K01580+K10712+K10712
Citrate cycle (TCA cycle)	ko00020	6	46	830	4230	Cla97C06G110800;Cla97C06G114000;Cla97C06G116670;Cla97C07G136660;Cla97C08G152670;Cla97C11G220850	K01900+K01648+K00025+K00026+K01648+K01610
Cutin, suberine and wax biosynthesis	ko00073	6	26	830	4230	Cla97C01G002650;Cla97C02G048160;Cla97C05G083330;Cla97C05G083350;Cla97C06G113080;Cla97C09G166850	K15398+K13356+K15404+K15404+K15398+K15402
Biosynthesis of unsaturated fatty acids	ko01040	6	27	830	4230	Cla97C02G036270;Cla97C02G046400;Cla97C05G108360;Cla97C07G136380;Cla97C08G160880;Cla97C10G200350	K00232+K10703+K10251+K00232+K03921+K10256
Flavonoid biosynthesis	ko00941	5	22	830	4230	Cla97C03G050850;Cla97C09G181670;Cla97C11G219640;Cla97C11G219660;Cla97C11G219690	K00487+K01859+K00588+K00588+K00588
Nitrogen metabolism	ko00910	5	34	830	4230	Cla97C03G060020;Cla97C05G086890;Cla97C05G107480;Cla97C08G154780;Cla97C10G199080	K01915+K01915+K01673+K01673+K00284
Sphingolipid metabolism	ko00600	5	26	830	4230	Cla97C01G021090;Cla97C01G022770;Cla97C06G111390;Cla97C08G152380;Cla97C11G218690	K04711+K04712+K01634+K12349+K07407
2-Oxocarboxylic acid metabolism	ko01210	5	48	830	4230	Cla97C01G016820;Cla97C08G160480;Cla97C08G161460;Cla97C09G174140;Cla97C11G220050	K14682+K00826+K14272+K00053+K14454
Ether lipid metabolism	ko00565	5	23	830	4230	Cla97C01G007800;Cla97C05G097260;Cla97C05G105240;Cla97C06G123370;Cla97C07G139470	K00993+K16860+K00993+K01047+K01115
Other glycan degradation	ko00511	5	17	830	4230	Cla97C01G001320;Cla97C01G008150;Cla97C02G047560;Cla97C05G092720;Cla97C11G217190	K01206+K01191+K01206+K15923+K12373
Basal transcription factors	ko03022	5	39	830	4230	Cla97C03G062470;Cla97C05G097350;Cla97C07G129990;Cla97C09G171300;Cla97C09G175020	K03120+K03130+K03138+K03125+K03129
Circadian rhythm - plant	ko04712	5	33	830	4230	Cla97C07G133850;Cla97C08G151850;Cla97C08G160550;Cla97C09G175760;Cla97C11G220070	K12116+K12120+K12125+K10143+K12118
Nicotinate and nicotinamide metabolism	ko00760	5	17	830	4230	Cla97C05G086390;Cla97C06G120130;Cla97C07G134220;Cla97C09G180410;Cla97C10G204410	K03787+K03426+K00767+K00278+K18551
SNARE interactions in vesicular transport	ko04130	5	36	830	4230	Cla97C02G035090;Cla97C02G035110;Cla97C04G070380;Cla97C09G173820;Cla97C10G201220	K08486+K08486+K08495+K08503+K08486
Fatty acid elongation	ko00062	5	26	830	4230	Cla97C02G046400;Cla97C05G089490;Cla97C05G104600;Cla97C05G108360;Cla97C06G119920	K10703+K15397+K15397+K10251+K15397
Stilbenoid, diarylheptanoid and gingerol biosynthesis	ko00945	4	15	830	4230	Cla97C03G050850;Cla97C11G219640;Cla97C11G219660;Cla97C11G219690	K00487+K00588+K00588+K00588
Aminoacyl-tRNA biosynthesis	ko00970	4	53	830	4230	Cla97C01G020500;Cla97C02G050660;Cla97C05G093590;Cla97C06G111780	K01880+K04567+K01873+K14164
Lysine degradation	ko00310	4	22	830	4230	Cla97C01G019820;Cla97C02G029440;Cla97C03G064950;Cla97C09G163100	K18826+K00626+K14157+K14085
Selenocompound metabolism	ko00450	4	17	830	4230	Cla97C05G085860;Cla97C05G099770;Cla97C10G185400;Cla97C10G191230	K13811+K13811+K01761+K08247
Linoleic acid metabolism	ko00591	4	28	830	4230	Cla97C02G041480;Cla97C06G115570;Cla97C06G123370;Cla97C11G219830	K15718+K15718+K01047+K00454
RNA polymerase	ko03020	3	59	830	4230	Citrullus_lanatus_newGene_1398;Cla97C03G053490;Cla97C07G142080	K03043+K03020+K03016
Glycosphingolipid biosynthesis - globo series	ko00603	3	9	830	4230	Cla97C03G057170;Cla97C11G217190;Cla97C11G218690	K01988+K12373+K07407
Glycosaminoglycan degradation	ko00531	3	18	830	4230	Cla97C04G078900;Cla97C06G126300;Cla97C11G217190	K07964+K01205+K12373
Zeatin biosynthesis	ko00908	3	21	830	4230	Cla97C03G065820;Cla97C04G070610;Cla97C08G158260	K00279+K13495+K00279
N-Glycan biosynthesis	ko00510	3	39	830	4230	Cla97C05G108040;Cla97C09G179210;Cla97C10G185910	K00737+K12670+K12668
AGE-RAGE signaling pathway in diabetic complications	ko04933	3	13	830	4230	Cla97C02G036250;Cla97C02G037530;Cla97C11G208770	K04392+K04392+K04392
One carbon pool by folate	ko00670	3	18	830	4230	Cla97C01G017480;Cla97C06G117660;Cla97C06G118090	K00600+K00600+K00297
ABC transporters	ko02010	3	18	830	4230	Cla97C01G024120;Cla97C09G179710;Cla97C09G180000	K05658+K05658+K05658
Pantothenate and CoA biosynthesis	ko00770	3	21	830	4230	Cla97C07G130140;Cla97C08G160480;Cla97C09G174140	K01918+K00826+K00053
Histidine metabolism	ko00340	3	18	830	4230	Cla97C01G008240;Cla97C08G149610;Cla97C09G163100	K11755+K01590+K14085
Folate biosynthesis	ko00790	3	15	830	4230	Cla97C05G090910;Cla97C11G207310;Cla97C11G223800	K20457+K13941+K18482
Brassinosteroid biosynthesis	ko00905	3	10	830	4230	Cla97C06G120030;Cla97C07G136050;Cla97C11G211710	K15639+K09587+K12640
Valine, leucine and isoleucine biosynthesis	ko00290	2	16	830	4230	Cla97C08G160480;Cla97C09G174140	K00826+K00053
Riboflavin metabolism	ko00740	2	9	830	4230	Cla97C08G147910;Cla97C08G153070	K14652+K00794
Monobactam biosynthesis	ko00261	2	8	830	4230	Cla97C05G085860;Cla97C05G099770	K13811+K13811
Arachidonic acid metabolism	ko00590	2	13	830	4230	Cla97C06G123370;Cla97C09G181760	K01047+K01254
Thiamine metabolism	ko00730	2	13	830	4230	Cla97C09G168550;Cla97C10G191480	K00949+K01662
Sulfur relay system	ko04122	2	11	830	4230	Cla97C06G109420;Cla97C10G189440	K12161+K11996
Lysine biosynthesis	ko00300	1	10	830	4230	Cla97C09G163100	K14085
Synthesis and degradation of ketone bodies	ko00072	1	5	830	4230	Cla97C02G029440	K00626
Glycosylphosphatidylinositol(GPI)-anchor biosynthesis	ko00563	1	22	830	4230	Cla97C10G195680	K05287
Sesquiterpenoid and triterpenoid biosynthesis	ko00909	1	14	830	4230	Cla97C11G210690	K00801
Biotin metabolism	ko00780	1	14	830	4230	Cla97C03G063990	K00208
Vancomycin resistance	ko01502	1	3	830	4230	Cla97C04G077680	K02563
Monoterpenoid biosynthesis	ko00902	1	5	830	4230	Cla97C03G064390	K15095
Non-homologous end-joining	ko03450	1	8	830	4230	Cla97C11G217720	K10777
Glycosphingolipid biosynthesis - ganglio series	ko00604	1	4	830	4230	Cla97C11G217190	K12373
Caffeine metabolism	ko00232	1	2	830	4230	Cla97C03G063500	K00106
